# Supplementary material for: Immunohistochemical evaluation of T cell receptor and T cell receptor beta constant 1 expression distinguishes benign and neoplastic immature T-cell populations and reveals discrete TRBC1/TCR phenotypes
Source: J Hematop. 2025 Dec 13;18(1):61. doi: 10.1007/s12308-025-00674-2 (PMC12701855; doi:10.1007/s12308-025-00674-2)
Supplement: Supplementary file 1 — (XLSX 21.5 KB) [file 12308_2025_674_MOESM1_ESM.xlsx]

## Sheet: ST_1_IHC_Extended
Supplementary Table 1: Extended IHC phenotype of T-LL Cases
Patient #	Specimen # (for manuscript)	CD3	TdT	TCR-BF1	TCR Delta	TRBC1	TRBC1 TCR IHC Category	Keratin	CD34	CD1a	CD123	CD117	CD99	CD56	CD7	CD4	CD8	CD10	CD5	CD38	CD2
12	14	+	+	+ (V S)	-	+ RESTRICTED (>85%)	TRBC1+TCRBF1+			+						+	+
12	15	+	+	+	-	+ RESTRICTED (>85%)	TRBC1+TCRBF1+	-	-	+					+	+	+	+ (S/V)	+		+
13	16	+	+	+ (W/V S)	-	+ RESTRICTED (>85%)	TRBC1+TCRBF1+			+					+						+
5	6	+	+	-	-	+ RESTRICTED (>85%)	TRBC1+TCRBF1-		-	-
1	1	+	+	+	-	- RESTRICTED (<15%)	TRBC1-TCRBF1+		-	+			+		+	+	+		+		+
8	9	+	+	+ (W)	-	- RESTRICTED (<15%)	TRBC1-TCRBF1+		-	+ (W/S)	-	-
16	19	+	+ (W)	+	-	- RESTRICTED (<15%)	TRBC1-TCRBF1+	-	-	+	-	+ (W, S)	+	-	+	+	+	+	+		+
18	21	+	+	+ (W/V S)	-	- RESTRICTED (<15%)	TRBC1-TCRBF1+		-	+					+	+ W/S	+	+	+		+
20	23	+	+	+	-	- RESTRICTED (<15%)	TRBC1-TCRBF1+		-	+						+	+	+
2	2	+	+	-	+	- RESTRICTED (<15%)	TRBC1-TCRδ+		+	-	- (W)				+	-	+ (W)	+ (W/V)
2	3	+	+ (S)	-	+	- RESTRICTED (<15%)	TRBC1-TCRδ+		+					+
4	5	+	+	-	+ (W/S)	- RESTRICTED (<15%)	TRBC1-TCRδ+			+(W/V)
6	7	+	+ (S)	-	+	- RESTRICTED (<15%)	TRBC1-TCRδ+		-	-		+
7	8	+	+	-	+	- RESTRICTED (<15%)	TRBC1-TCRδ+
9	11	+	+	-	+ (W/S)	- RESTRICTED (<15%)	TRBC1-TCRδ+			-						+, W/S	-		+
11	13	+	+	-	+ (W/S)	- RESTRICTED (<15%)	TRBC1-TCRδ+
3	4	+ (W)	+	-	-	- RESTRICTED (<15%)	TRBC1-TCR null
8	10	+	+	-	-	- RESTRICTED (<15%)	TRBC1-TCR null		-	+ (W/S)	-	-
10	12	+	+	-	-	- RESTRICTED (<15%)	TRBC1-TCR null		-		-		+		+	+ (W/S)	-	+	-	-
14	17	+	+	-	-	- RESTRICTED (<15%)	TRBC1-TCR null		-
15	18	+	+	-	-	- RESTRICTED (<15%)	TRBC1-TCR null			+					+	+	+
17	20	+	+ (S)	-	-	- RESTRICTED (<15%)	TRBC1-TCR null		-	-	-		+	-	+	-	-		+		+ (W)
19	22	+ (W)	+	-	-	- RESTRICTED (<15%)	TRBC1-TCR null			-	-				+ (W)				-
21	24	+	+	-	-	- RESTRICTED (<15%)	TRBC1-TCR null		-		-							-	+		+
Yellow indicates stains requiring 3-pathologist review
S=subset
V=variable intensity staining
W=weak

## Sheet: ST_2_FlowCytometry
Supplementary Table 2: Flow cytometry immunophenotype of T-LL cases
Patient #	Specimen #	sCD3	cCD3	sTRBC1	sTCR-α/β	sTCR-γ/δ	CD4	CD8	CD1a	CD34	nTdT	CD2	CD5	CD7	TRBC1 TCR IHC Category	Comment
12	14	+ (D,S)	+		+(D)	-	+(V)	+	+ (S)	-	-	+	+	+	TRBC1+TCRBF1+
12	15	+ (D,S)	+		-/+(D,S)	-	+ (D)	+ (V)	+ (S)	-	-	+	+(D)	+	TRBC1+TCRBF1+
13	16	-	+				+	+	+	-	-	+	+	+	TRBC1+TCRBF1+
5	6	+ (D)	+				-	-	-	-	-/+(D)	-	+(D)	+	TRBC1+ TCRBF1-
1	1	+(S)	+				+	+		-	-	+	+	+	TRBC1-TCRBF1+
8	9	-/+ (Minor S)	+				+	+ (V)	+ (D,S)	-	-	+	+	+	TRBC1-TCRBF1+
18	21	-/+ (Minor S)	+ (S)	-		-	+(S)	+ (S)	+ (S)	-	+ (S)	+	+(S)	+	TRBC1-TCRBF1+
20	23	+ (S)	+				+	-		-	+ (D)	+	+(D)	+	TRBC1-TCRBF1+
2	3	-	+				-	-	-	+	-	-	+	+	TRBC1- TCRδ +
4	5	+	+				+	+	+	-	+	+	+	+	TRBC1- TCRδ +
6	7	+	+				-	+(S)	-	-	-/+(D)	+	+(D)	+	TRBC1- TCRδ +
7	8	+					-	-	+(S)	-	+ (S)	+	+(S)	+	TRBC1- TCRδ +
9	11	-	+				-/+(D,S)	-		+ (S)	-	+	+(D,S)	+	TRBC1- TCRδ +
11	13	+ (D)	+ (V)	-		-	-/+(D,S)	-	+ (S)	-	+ (S)	+(D,S)	+(D)	+	TRBC1- TCRδ +
3	4	-	-/+ (Minor S)	-		-	-	-	-	+	+	-/+(D,S)	-/+(D, minor subset<75%)	+	TRBC1- TCR null	CD33+, >25%
8	10	-	+				+	+	+ (D,S)	-	-	+	+	+	TRBC1- TCR null
14	17	-/+ (Minor S)	+				+ (V)	+(V)	+ (S)	-	+ (D)	+	+	+	TRBC1- TCR null
15	18		+ (S)				+			-	+ (D,S)	+	+(D)	+	TRBC1- TCR null
17	20	-	+ (S)				-	-		-	-/+(D)	+	+	+	TRBC1- TCR null
19	22	+ (S)	+				+	-	-		+	-	+	+	TRBC1- TCR null
21	24	-	+(S)		-	-	-	+(S)	+(S)	-	-	+(D)	+(D)	+(D)	TRBC1- TCR null
Flow cytometry phenotype is designated as positive (+) or negative (-) in the T-lymphoblast population.
Green indicates samples in which TRBC1 was evaluated by flow cytometry and immunohistochemistry.
S=subset
D=dim
V=variable intensity staining
